# Supplementary material for: Evidence for the Complexity of MicroRNA-Mediated Regulation in Ovarian Cancer: A Systems Approach
Source: PLoS One. 2011 Jul 21;6(7):e22508. doi: 10.1371/journal.pone.0022508 (PMC3141058; doi:10.1371/journal.pone.0022508)
Supplement: Table S7 — Summary values of IC, PC and NC targets using overlap of miRanda and PicTar predictions. miRNA targets that were differentially expressed between CEPI and OSE based on t-test p<0.005 and fold change of at least 2 were classified as being IC or PC with their regulating miRNAs (while target genes that do not meet the above criteria are classified as NC). Total number of targets from the overlap of miRanda (M) and PicTar (PT) algorithms present after removing probesets with “Absent” calls in all samples is shown along with fraction of IC, PC and NC targets for each of the 12 annotated miRNAs. On average, 78.3% of the target mRNAs are in the NC group, 8.6% are in the IC group and 13.1% are in the PC group. (XLS) [file pone.0022508.s011.xls]

## Sheet: Sheet1
miRNA	Total Targets (M_PT)	Inversely Correlated Targets (%)	No Change (%)	Positively Correlated Targets (%)
miR-7	162	9.87654	83.3333	6.79012
miR-18a	84	16.6667	75	8.33333
miR-18b	86	18.6047	73.2558	8.13953
miR-126	3	0	100	0
miR-128	332	12.9518	79.5181	7.53012
miR-141	388	16.7526	75.2577	7.98969
miR-205	150	17.3333	73.3333	9.33333
Average (for upregulated miRNAs)	172.143	13.1694	79.9569	6.87373
miR-383	41	0	73.1707	26.8293
miR-320a	256	6.25	80.0781	13.6719
miR-193a-5p	17	5.88235	76.4706	17.6471
Average (for downregulated miRNAs)	104.667	4.04412	76.5731	19.3827
Average (for Up and Down)	138.405	8.60674	78.265	13.1282
