# Supplementary material for: Evidence for the Complexity of MicroRNA-Mediated Regulation in Ovarian Cancer: A Systems Approach
Source: PLoS One. 2011 Jul 21;6(7):e22508. doi: 10.1371/journal.pone.0022508 (PMC3141058; doi:10.1371/journal.pone.0022508)
Supplement: Table S8 — Summary values of IC, PC and NC targets using overlap of TargetScan and PicTar predictions. miRNA targets that were differentially expressed between CEPI and OSE based on t-test p<0.005 and fold change of at least 2 were classified as being IC or PC with their regulating miRNAs (while target genes that do not meet the above criteria are classified as NC). Total number of targets from the overlap of TargetScan (TS) and PicTar (PT) algorithms present after removing probesets with “Absent” calls in all samples is shown along with fraction of IC, PC and NC targets for each of the 12 annotated miRNAs. On average, 76.8% of the target mRNAs are in the NC group, 6.4% are in the IC group and 16.7% are in the PC group. (XLS) [file pone.0022508.s012.xls]

## Sheet: Sheet1
miRNA	Total Targets (TS_PT)	Inversely Correlated Targets (%)	No Change (%)	Positively Correlated Targets (%)
miR-7	123	11.3821	81.3008	7.31707
miR-18	72	15.2778	81.9444	2.77778
miR-126	6	0	100	0
miR-128	326	12.5767	76.9939	10.4294
miR-141	210	14.7619	75.2381	10
miR-205	93	17.2043	69.8925	12.9032
Average (for upregulated miRNAs)	138.333	11.8671	80.8949	7.23792
miR-383	17	0	82.3529	17.6471
miR-320a	129	3.10078	86.0465	10.8527
miR-193a-5p	2	0	50	50
Average (for downregulated miRNAs)	49.3333	1.03359	72.7998	26.1666
Average (for Up and Down)	93.8333	6.45036	76.8474	16.7023
